# Supplementary material for: Medicinal gold compounds form tight adducts with the copper chaperone Atox-1: biological and pharmacological implications
Source: Royal Society of Chemistry journal article supplement (doi:10.1039/c2cc36610j), 2012-01-01
Supplement: c2cc36610j.pdf [file c2cc36610j.pdf]

## Electronic Supplementary Information

### Medicinal Gold Compounds form Tight Adducts with the Copper Chaperone

#### Atox-1: an ESI MS investigation.

##### Experimental section

*Materials.* The various gold(III) complexes were synthesized as previously described (see the respective refs). Auranofin was purchased at Vinci-Biochem. Copper transport protein Atox1 was purchased from Giotto Biotech.

*ESI Mass Spectrometry.* For the analysis Atox-1 was dissolved ( $10^{-4}$  M) in 25 mM tetramethylammonium acetate buffer (TMeAmAc), pH 7.4 containing DTT (1:5 protein:DTT molar ratio). Then the three gold (III) complexes and Auranofin were added (1:1 metal/protein ratio) to the solution and incubated at room temperature for 24 or 72h. After a 10-fold dilution with 1% HCOOH, ESI-MS spectrum was recorded by direct introduction at 5  $\mu$ l/min flow rate in an LTQ-Orbitrap high-resolution mass spectrometer (Thermo, San Jose, CA, USA), equipped with a conventional ESI source. The working conditions were the following: spray voltage 3.1 kV, capillary voltage 45 V and capillary temperature 220 °C. The sheath and the auxiliary gases were set, respectively, at 17 (arbitrary units) and 1 (arbitrary units). For acquisition, Xcalibur 2.0. software (Thermo) was used and monoisotopic and average deconvoluted masses were obtained by using the integrated Xtract tool. For spectrum acquisition a nominal resolution (at m/z 400) of 100,000 was used.

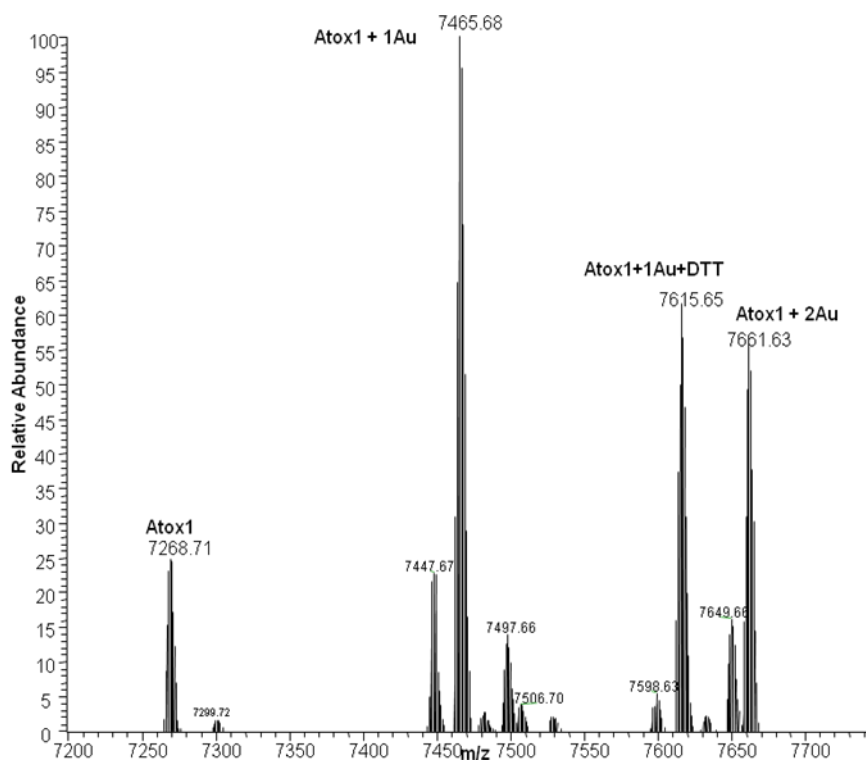

Figure S1. LTQ-Orbitrap ESI-MS spectrum of Atox-1 sequentially treated with  $\text{CuCl}_2$  and Aubipyc (1:2:1 molar ratio) at room temperature. Incubation time 24 h (see: I. Anastassopoulou, L. Banci, I. Bertini, F. Cantini, E. Katsari, A. Rosato, *Biochemistry* 2004, **43**, 13046-53 for details of sample preparation).

Table S1

Experimental and theoretical values for the main ESI MS peaks

| <b>Peaks</b> | <b>Exp. value</b> | <b>Theor. monoisotopic value</b> | <b>Theor. average value</b> |
|--------------|-------------------|----------------------------------|-----------------------------|
| <b>a</b>     | 7269,7            | 7265.7                           | 7270.4                      |
| <b>b</b>     | 7465,7            | 7462.7                           | 7467.4                      |
| <b>c</b>     | 7661,6            | 7659.6                           | 7664.3                      |
| <b>d</b>     | 7583,7            | 7580.8                           | 7585.5                      |
